# Supplementary material
Source: PubMed Central journal article supplement (PMC8485421)
Supplement: mmc1.pdf [file mmc1.pdf]

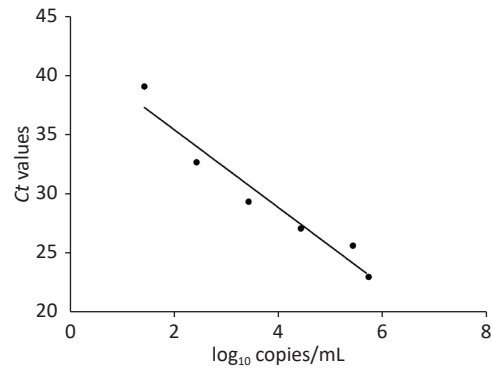

**Supplementary Figure S1.** Standard curve of Ct values of real-time RT-PCR against the log<sub>10</sub> copies/mL of SARS-CoV-2.

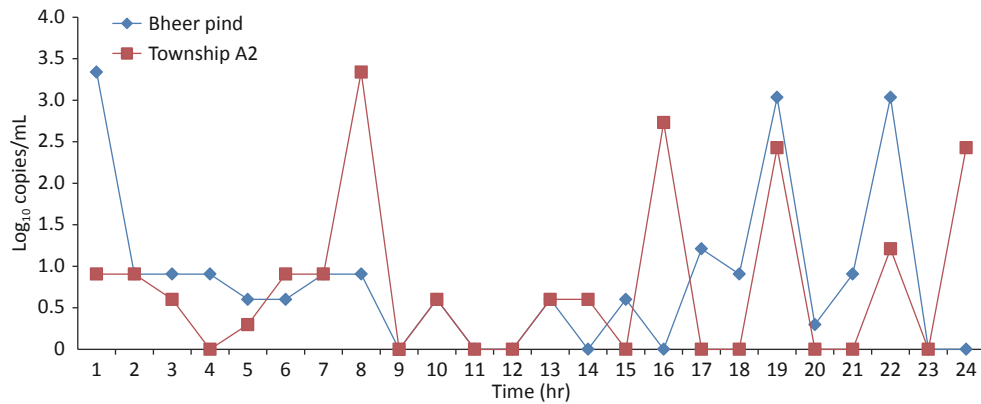

**Supplementary Figure S2.** Graphical display of the SARS-CoV-2 viral load as log<sub>10</sub> copies/mL at Site 05 of Johar Town and Site 20 of Township with respect to time in hours starting from 1:00 am for the period of 24 hours.

**Supplementary Table S1.** Dimensions of sewage pipelines and longitudes and latitudes of the sampling sites

| Sampling sites       | Line diameter (inches) | Longitude  | Latitude   |
|----------------------|------------------------|------------|------------|
| Johar town C-Block   |                        |            |            |
| Site 1               | 12                     | 74.29545   | 31.4524723 |
| Site 2               | 9                      | 74.2977366 | 31.4557036 |
| Site 3               | 9                      | 74.2942093 | 31.4573861 |
| Site 4               | 9                      | 74.2989921 | 31.4552673 |
| Bheer pind LS        | 42                     | 74.2952135 | 31.4572428 |
| Township A-II sector |                        |            |            |
| Site 1               | 9                      | 74.2928192 | 31.435475  |
| Site 2               | 12                     | 74.294026  | 31.454058  |
| Site 3               | 36                     | 74.2929095 | 31.4352528 |
| Site 4               | 36                     | 74.2929237 | 31.4354824 |
| Site 5               | 9                      | 74.3165282 | 31.4551185 |
| Site 6               | 9                      | 74.3157992 | 31.4552004 |
| Site 7               | 9                      | 74.3175337 | 31.4546141 |
| Site 8               | 18                     | 74.3180418 | 31.4547766 |
| Site 9               | 18                     | 74.3166218 | 31.4552856 |
| Site 10              | 18                     | 74.3175544 | 31.4549163 |
| Site 11              | 9                      | 74.3175511 | 31.4546758 |
| Site 12              | 9                      | 74.3189623 | 31.451292  |
| Site 13              | 9                      | 74.3191111 | 31.4515717 |
| Site 14              | 9                      | 74.3145578 | 31.4526552 |
| Site 15              | 9                      | 74.3142842 | 31.4521259 |
| Site 16              | 9                      | 74.3157992 | 31.4552004 |
| Site 17              | 9                      | 74.3165282 | 31.4551185 |
| Site 18              | 9                      | 74.3145578 | 31.4526552 |
| Site 19              | 9                      | 74.3175337 | 31.4546141 |
| Township LS          | 36                     | 74.3128196 | 31.4515134 |
| Green town DS        | 36                     | 74.3125476 | 31.455127  |
| Ameer chowk DS       | 36                     | 74.289159  | 31.4343771 |
| Sadiq chowk DS       | 36                     | 74.3055126 | 31.4483829 |

**Note.** LS: lift station; DS: disposal station.
